# Supplementary material for: Down-regulation of guanylate binding protein 1 causes mitochondrial dysfunction and cellular senescence in macrophages
Source: PubMed Central journal article supplement (PMC5785964; doi:10.1038/s41598-018-19828-7), 2018-01-26
Supplement: 41598_2018_19828_MOESM1_ESM.pdf [file 41598_2018_19828_MOESM1_ESM.pdf]

# **Down-regulation of guanylate binding protein 1 causes mitochondrial dysfunction and cellular senescence in macrophages**

Xiaoxue Qiu<sup>1</sup>, Hong Guo<sup>1</sup>, Junshu Yang<sup>2</sup>, Yinduo Ji<sup>2</sup>, Chia-Shan Wu<sup>3</sup>, and Xiaoli Chen<sup>1\*</sup>

<sup>1</sup>Department of Food Science and Nutrition, and <sup>2</sup>Department of Veterinary Biomedical Sciences, College of Veterinary Medicine, University of Minnesota, Twin Cities, Minnesota, USA; <sup>3</sup>Department of Nutrition and Food Science, Texas A&M University, College Station, TX, USA

\*Corresponding author: Dr. Xiaoli Chen, Department of Food Science and Nutrition, University of Minnesota-Twin Cities, St. Paul, MN 55108-1038, E-mail: xlchen@umn.edu

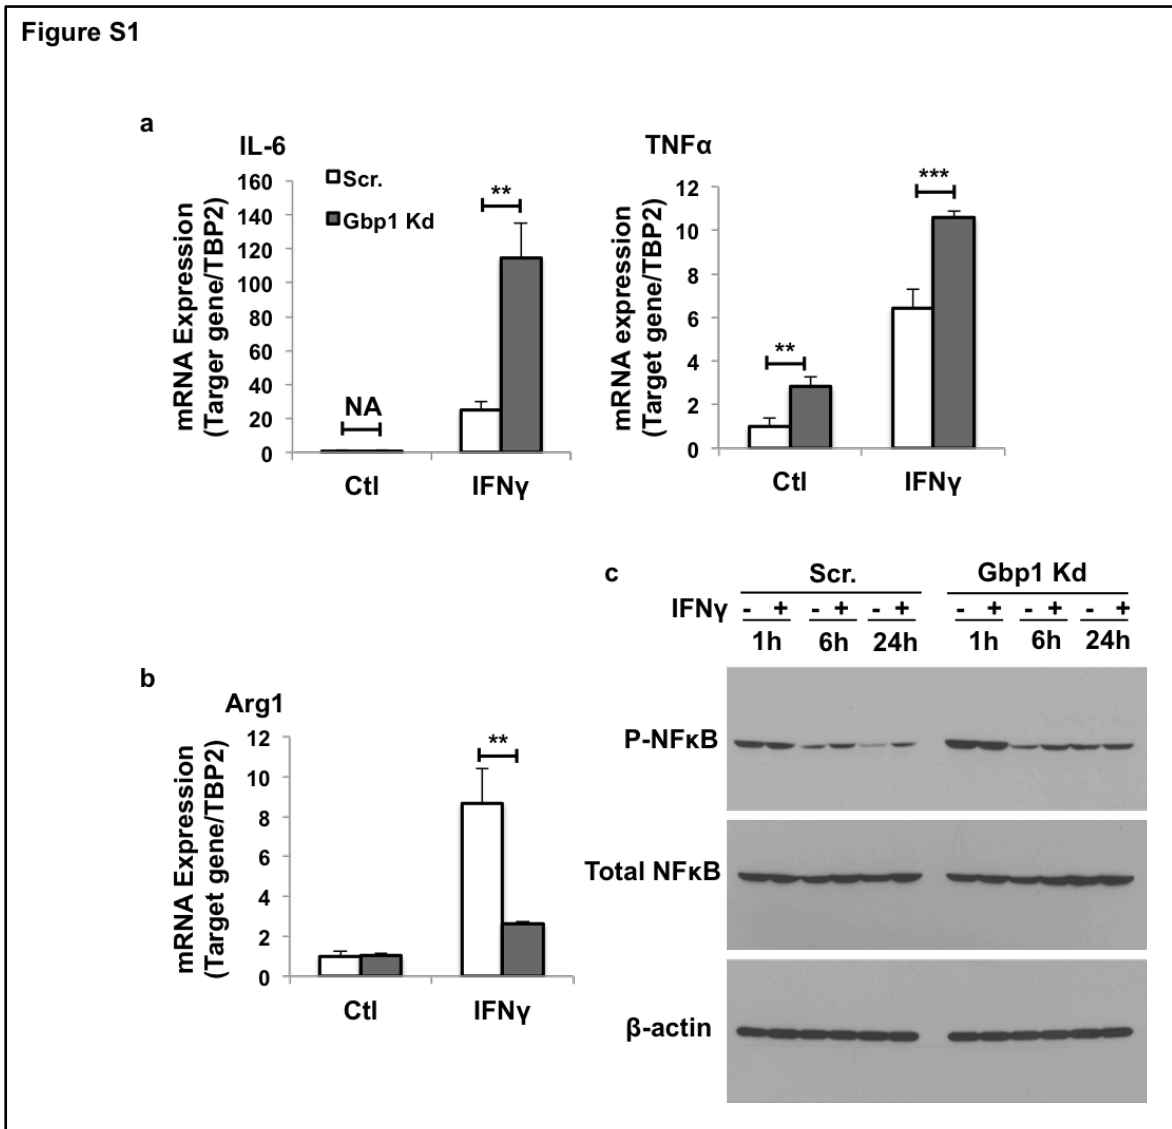

**Figure S1. Effect of Gbp1 downregulation on M1 polarization of macrophages.** (a-b) Scr and Gbp1 Kd macrophages were stimulated by IFN $\gamma$  (10 ng/ml) for 24 hours. mRNA expression levels of pro-inflammatory (IL-6 and TNF $\alpha$ ) and anti-inflammatory (Arg1) cytokines were determined by qPCR (n=3). Data are presented as mean  $\pm$  SEM. \*\*  $P < 0.01$ , \*\*\*  $P < 0.001$  versus Scr cells. (c) Macrophages were treated with IFN $\gamma$  (10 ng/ml) for 1, 6 and 24 hours. NF $\kappa$ B Phosphorylated levels were detected by western blotting.

Figure S2

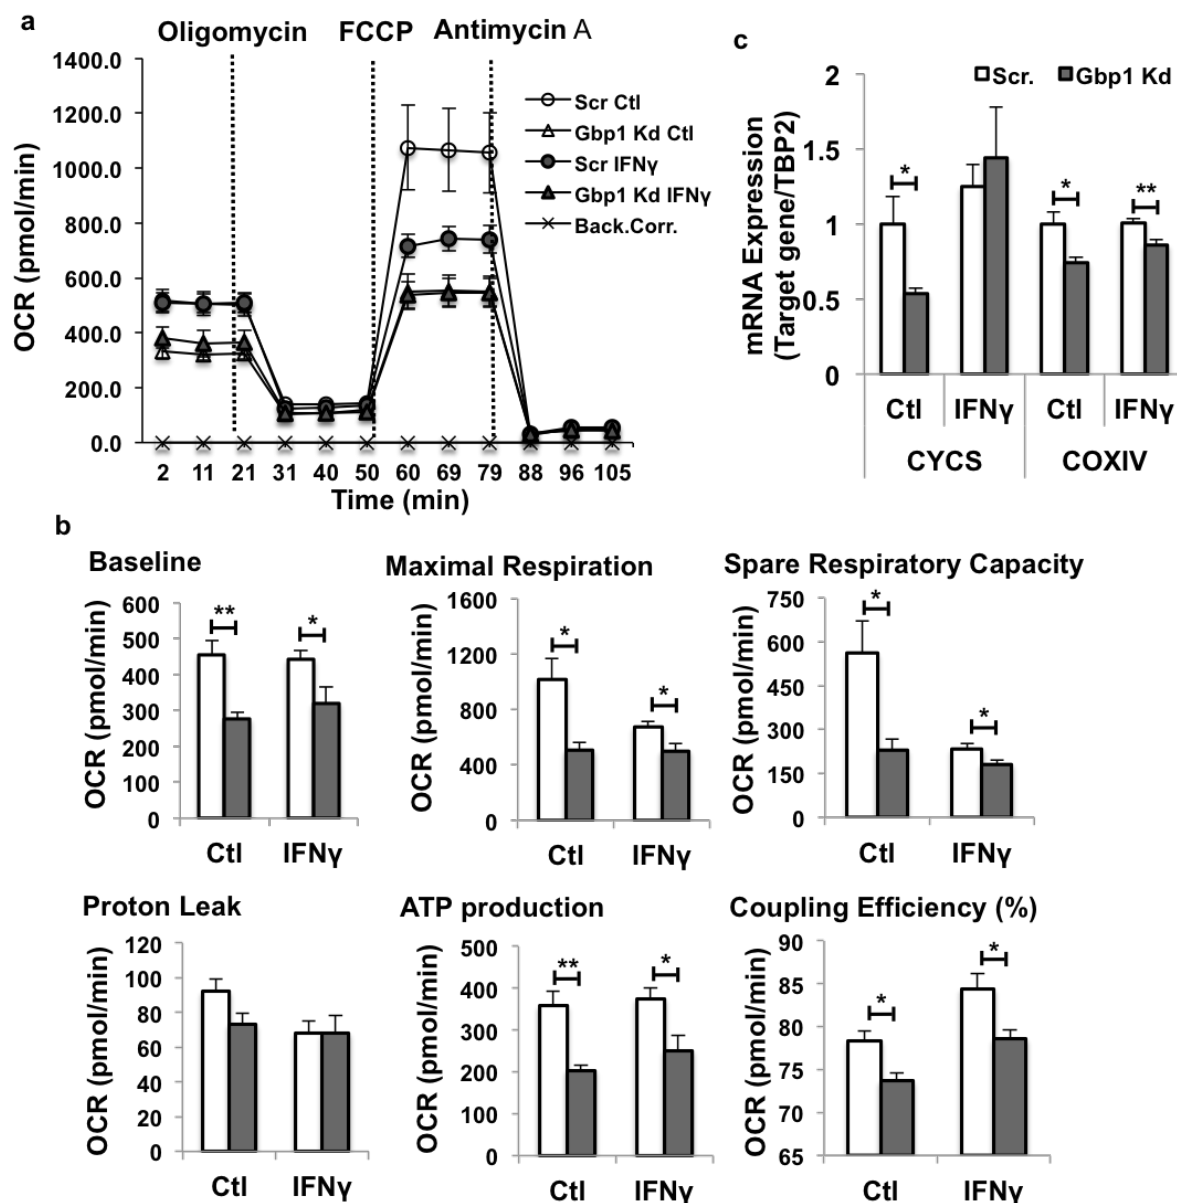

**Figure S2. Effect of Gbp1 downregulation on mitochondrial function in macrophages.** (a-b) OCR was determined in Scr and Gbp1 Kd macrophages treated with IFN $\gamma$  (10 ng/ml) for 16 hours, n = 5. Back.Corr.: Background Correction. (c) mRNA expression levels of genes encoding electron transport chain components CYCS and COXIV were determined in Scr and Gbp1 Kd macrophages treated with 10 ng/ml IFN $\gamma$  for 24 hours, n=3. Data are presented as mean  $\pm$  SEM. \*  $P < 0.05$ , \*\*  $P < 0.01$  versus Scr cells.

**Figure S3**

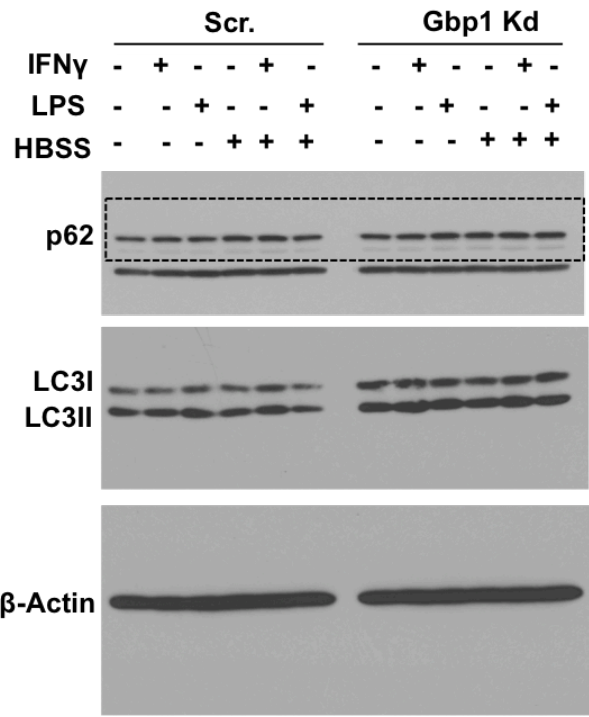

**Figure S3. Autophagic flux in Gbp1 Kd macrophages.**

Macrophages were treated with LPS (1 $\mu$ g/ml) or IFN $\gamma$  (10 ng/ml) for 15 min under fed or starvation conditions.

Autophagic proteins p62 and LC3I/II were detected by western blotting.

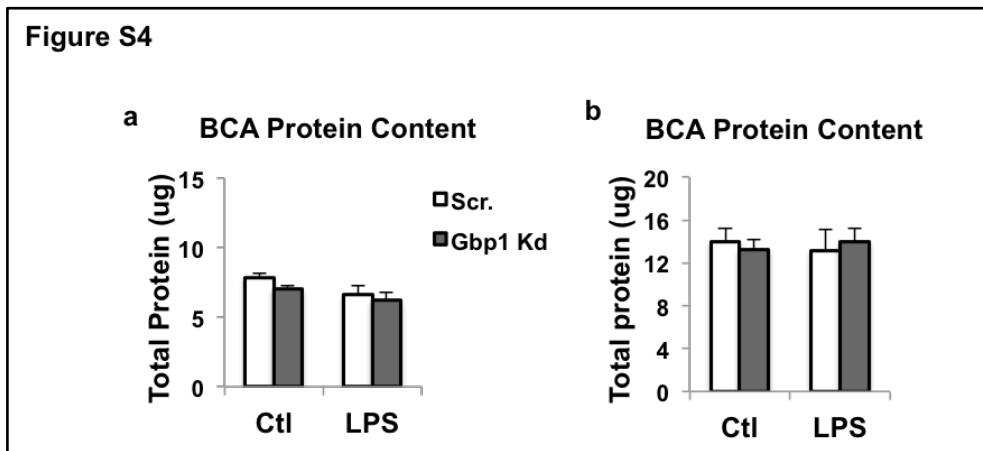

**Figure S4. Total protein levels in Scr and Gbp1 Kd macrophages for cellular respiratory and glycolytic activity assay.** (a-b) The BCA assay was performed to detect protein contents in Scr and Gbp1 Kd macrophages after cellular respiratory assay for OCR measurement (a) and glycolytic activity assay for ECAR measurement (b).

**Figure S5**

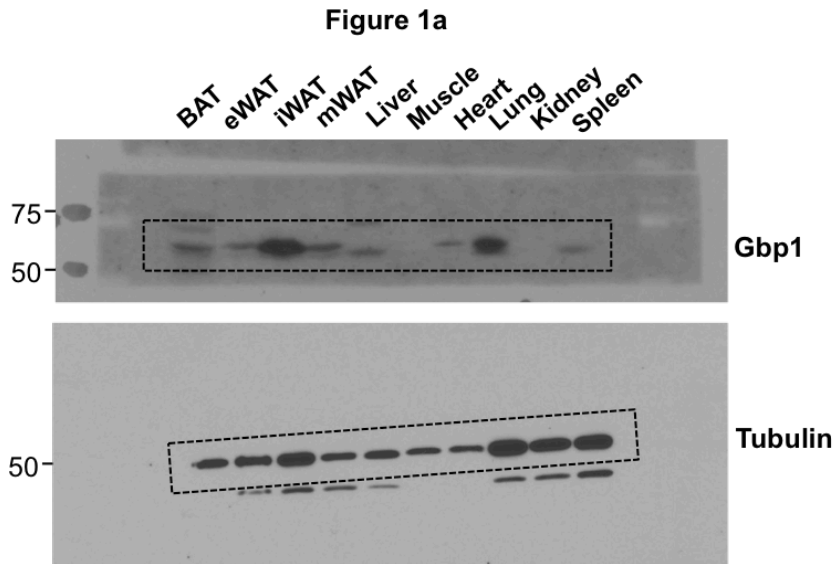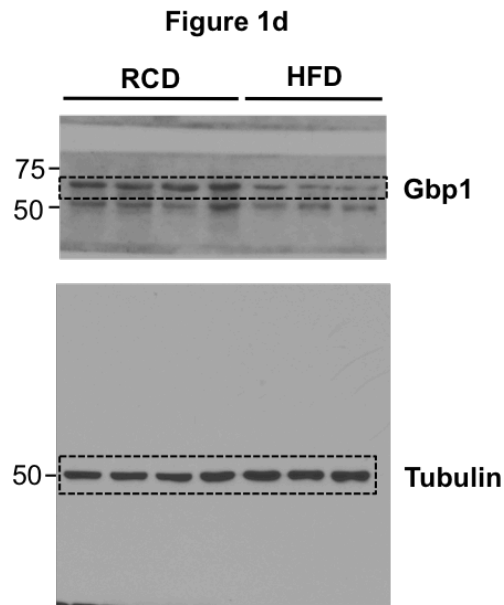

**Figure S5. Unprocessed western blots for Fig. 1.**

Figure S5

Figure 1e

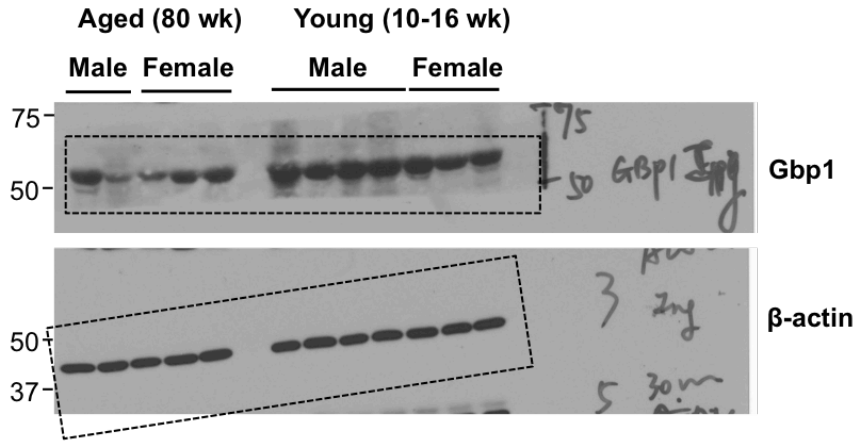

Figure 1f

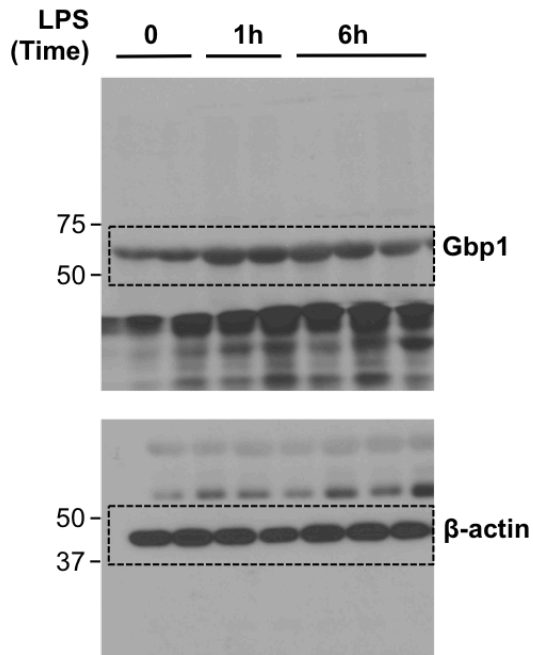

Figure S5. Unprocessed western blots for Fig. 1.

Figure S5

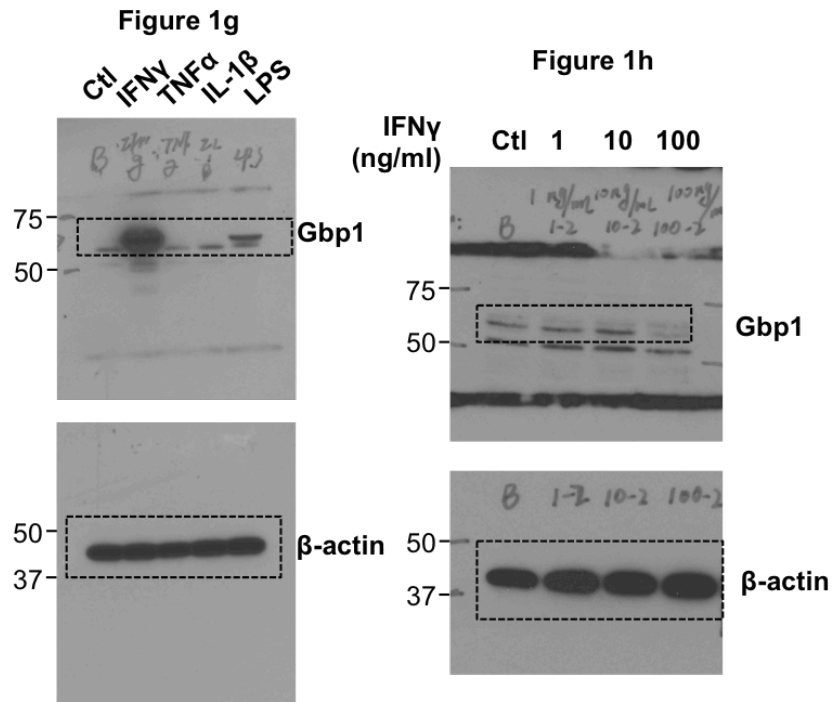

Figure S5. Unprocessed western blots for Fig. 1.



Figure S6

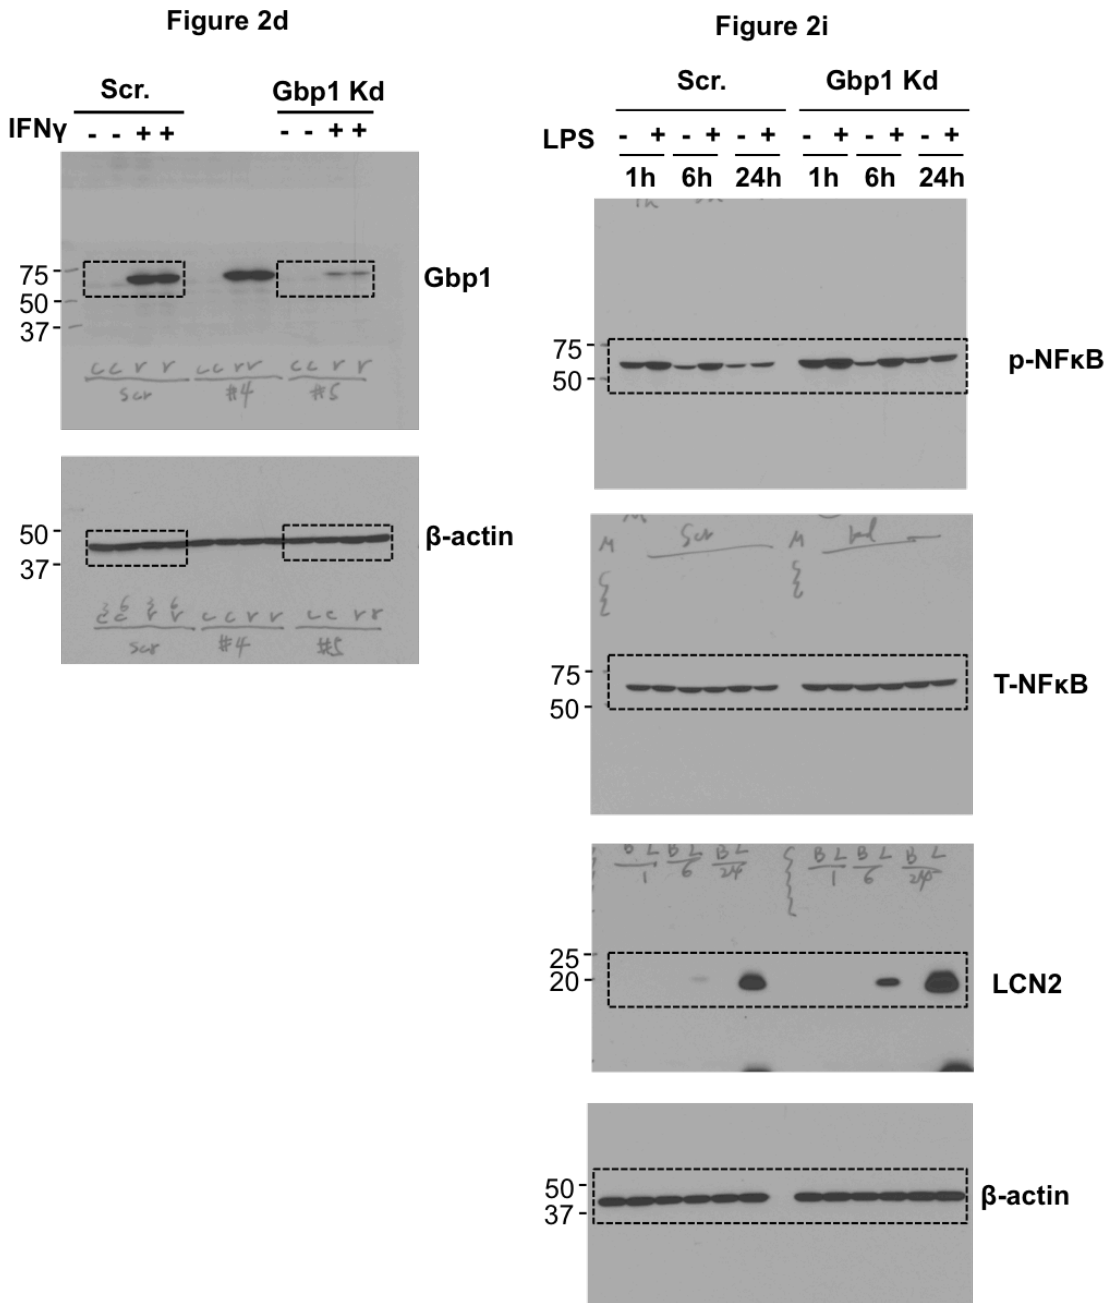

Figure S6. Unprocessed western blots for Fig. 2.

Figure S7

Figure 3a

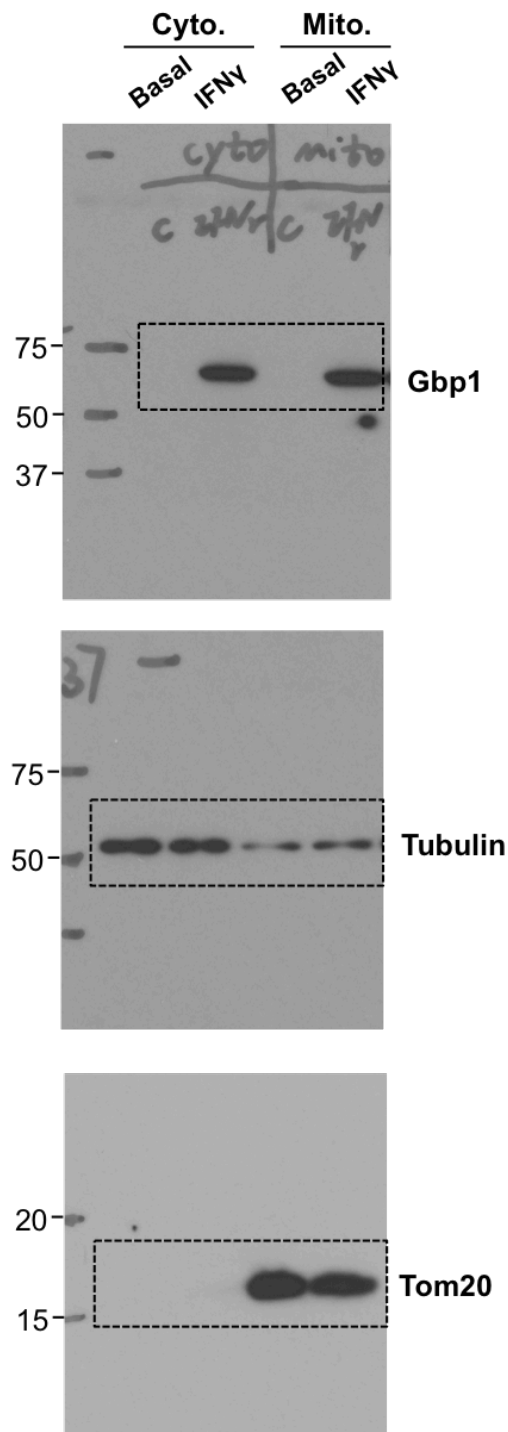

Figure S7. Unprocessed western blots for Fig. 3.

Figure S8

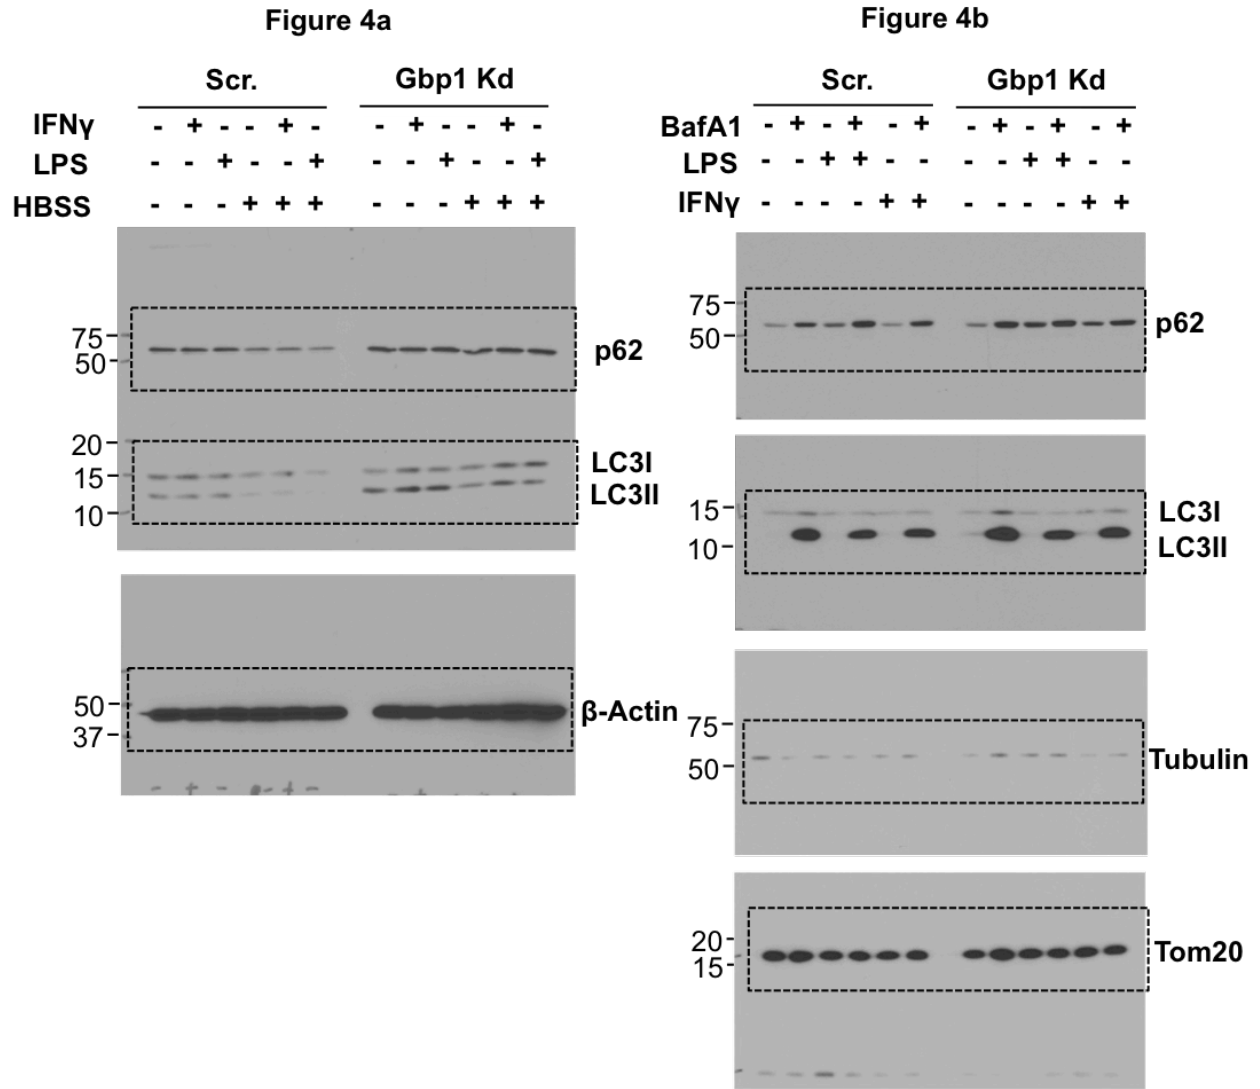

Figure S8. Unprocessed western blots for Fig. 4.

Figure S8

Figure 4c

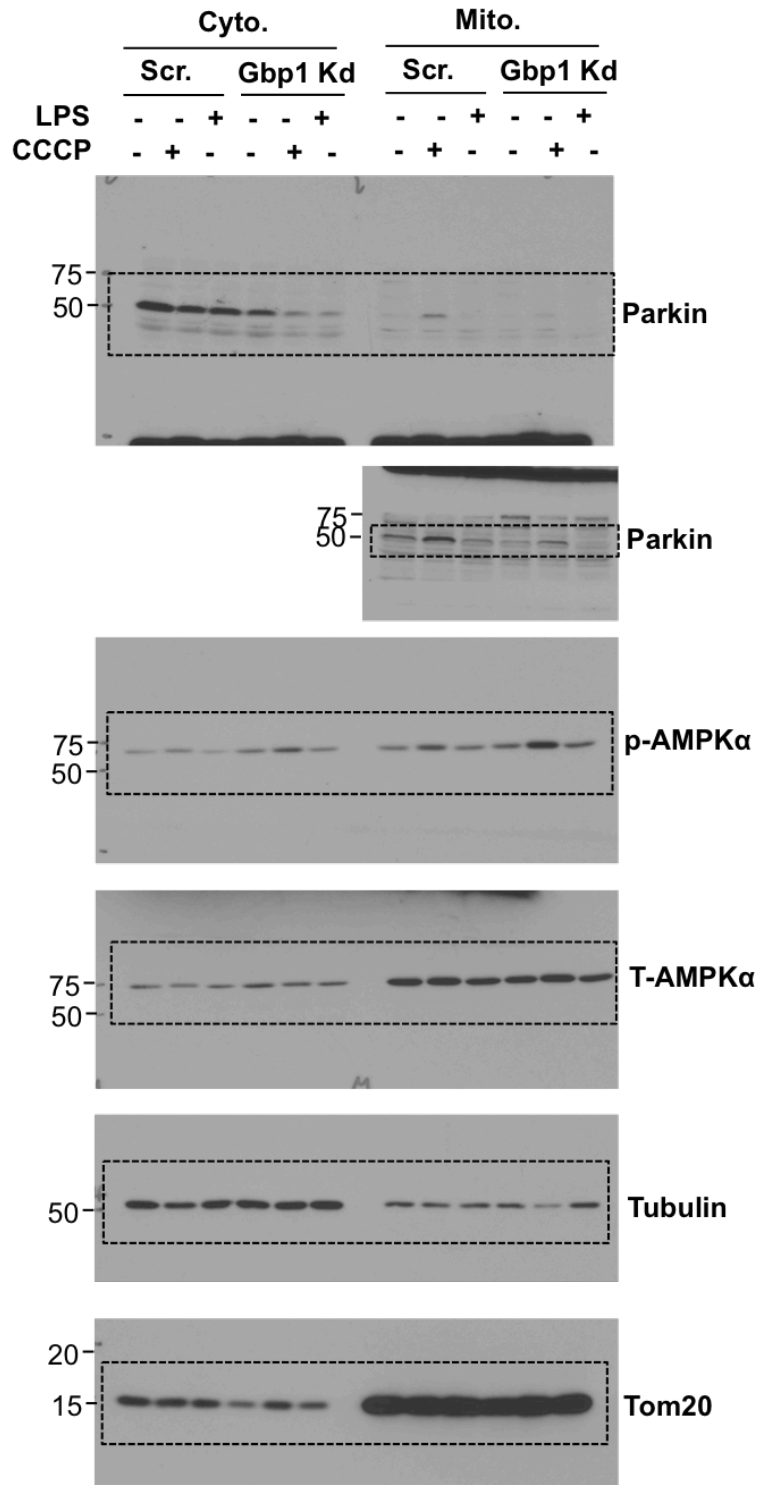

Figure S8. Unprocessed western blots for Fig. 4.

Figure S9

Figure 6a

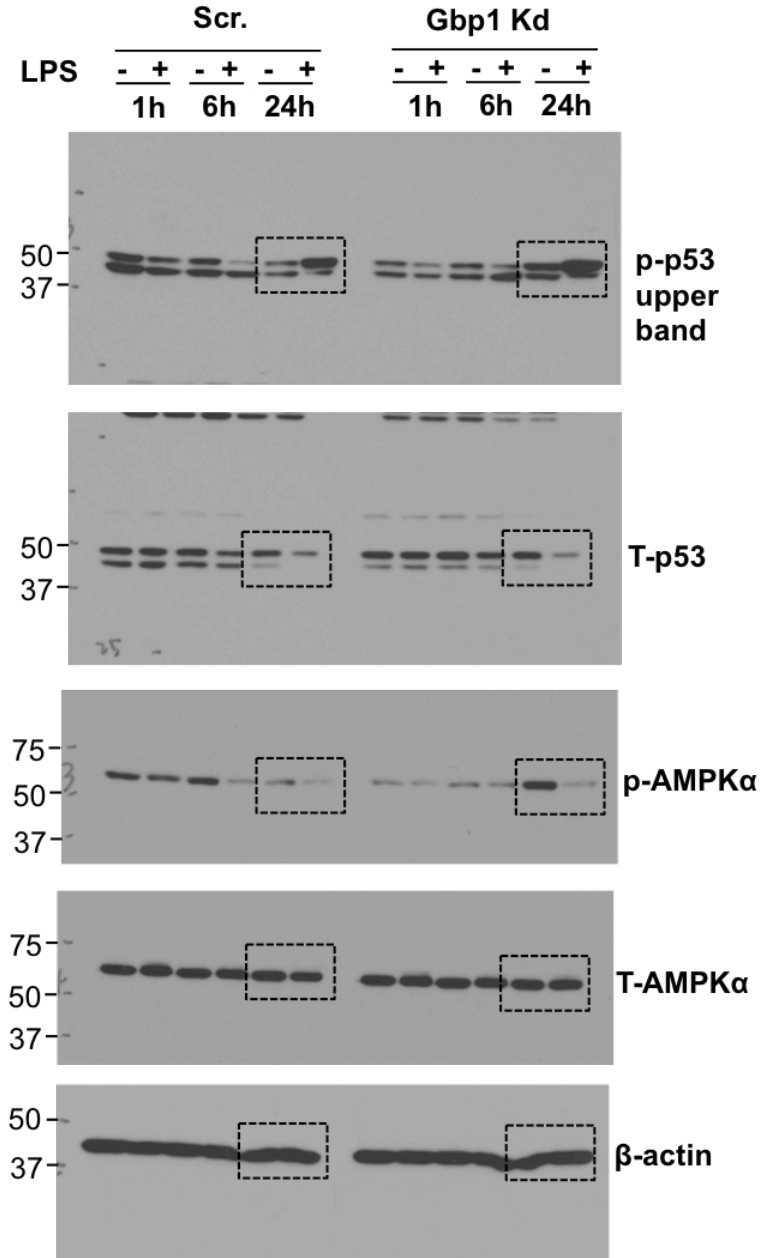

Figure S9. Unprocessed western blots for Fig. 6.

**Table S1. Real-time qPCR primer sequences**

| Target       | Forward primers (5' to 3') | Reverse primers (5' to 3') |
|--------------|----------------------------|----------------------------|
| Gbp1         | AAGAACATGCCTCCACCTCG       | ATCCAAAGCTGTCCCCGAAG       |
| Gbp2         | CCTGACCAGAGTGGGGTAGA       | CAGTCGCGGCTCATTAAAGC       |
| Gbp3         | ACGGCAAGACCAAGACTCTG       | GTCACTGCGTTCTCCAGACA       |
| Gbp5         | AGCCCAGGAAGAGGCTGATA       | ATGGAGGGCTCAGGTTTGG        |
| Gbp7         | AGTGGTGGTGGCCATTGTAG       | ATCTCCTAAGCCCTCCGTGT       |
| IL-6         | TCTGCAAGAGACTTCCATCC       | TTAGCCACTCCTTCTGTGAC       |
| TNF $\alpha$ | CAGAAACACAAGATGCTGGG       | CAAAAGAGGAGGCAACAAGG       |
| COX2         | CCTCCACTCATGAGCAGTCC       | TCAGAGCATTGGCCATAGAA       |
| Arg1         | AACACGGCAGTGGCTTTAACC      | GGTTTTCATCTGGCGCATT        |
| CYCS         | CACGGCTCTCCCTTTCTCAAG      | ACAGTTGCCTCCTGGTGGTTA      |
| COXIV        | ATGTCACGATGCTGTCTGCC       | GTGCCCTGTTCATCTCGGC        |
| CPT1b        | CCTCCCTGGGCATGATTG         | ACGCCACTCACGATGTTCTTC      |
| Acox1        | GTGCAGCTCAGAGTCTGTCCAA     | TACTGCTGCGTCTGAAAATCCA     |
| CS           | GTTGGCAAAGACGTGTCAGAT      | TCAGAGCAAACCTCTCGCTGAC     |
| Gpx1         | CCGCTTTCGTACCATCGACAT      | CCAGTAATCACCAAGCCAATGC     |
| GSTA4        | CTGTACTGTCCGACTTCCCTC      | CTCTGACTTCCGGGTTGCAG       |
| SOD1         | AAGCATGGCGATGAAAGCG        | ACAACACAACCTGGTTCACCGC     |
| Prdx1        | AGTCCAGGCCTTCCAGTTCACT     | GGCTTGATGGTATCACTGCCAG     |
| UCP2         | TGACAAACAGGTCAAGAGAGGGCA   | TCAGGCCAACTGACAGCATTCTTA   |
| Glut1        | TCAACGAGCATCTTCGAGAAGGCA   | TCGTCCAGCTCGCTCTACAACAA    |
| GYS1         | TTCTACAACAACCTGGAG         | CTGAGCAGATAGTTGAGC         |
| Tbp2         | GAAGAACAATCCAGACTAGCAGCA   | CCTTATAGGGAACTTCACATCACAG  |
